# Supplementary material
Source: MDPI journal article supplement (https://www.mdpi.com/2071-1050/10/11/3988)
Supplement: s1 [file s1]

## Variables consider for the regression analysis in the paper [Sustainability 2018:xy]

| Variable in Regression models          | Question-number in the original survey (German Version)                        |
|----------------------------------------|--------------------------------------------------------------------------------|
| Livestock endowment ( $W_i$ )          | 801                                                                            |
| Appropriation ( $a_i$ )                | 801-808                                                                        |
| Provision ( $p_i$ )                    | 901                                                                            |
| Opportunity costs ( $O_i$ )            | 1105-1107                                                                      |
| Land use intensity (control)           | 601; 801                                                                       |
| Agricultural income (control)          | 401-404; 1107                                                                  |
| Leadership (control)                   | 108                                                                            |
| Successor (control)                    | 203                                                                            |
| Years left to retirement (control)     | 103                                                                            |
| Maximum sustainable yields ( $MSY_c$ ) | QUALITATIVE DATA – structured interviews with the monitors of the corporations |
| Provision rules ( $inst_c$ )           | "..."                                                                          |
| Fine for provision defection ( $F_c$ ) | "..."                                                                          |
| Group appropriation ( $a_{-i}$ )       | 107; 801-808                                                                   |
| Group provision ( $p_{-i}$ )           | 107; 901                                                                       |

For the original questionnaire in German please see: <https://osf.io/w3sg6>

## Survey questions: Only those used to calculate the variables as used in the regression models

### 1) Farm identification

|     |                                                           |                                                                                                                                                                                                                                                                                                               |                                                              |
|-----|-----------------------------------------------------------|---------------------------------------------------------------------------------------------------------------------------------------------------------------------------------------------------------------------------------------------------------------------------------------------------------------|--------------------------------------------------------------|
| 101 | Are you the owner of the farm?                            | Yes<br>No                                                                                                                                                                                                                                                                                                     | → <input type="checkbox"/> 1<br>→ <input type="checkbox"/> 2 |
| 102 | In which year have did you become the owner of the farm?  | _ _ _ _                                                                                                                                                                                                                                                                                                       |                                                              |
| 103 | In which year were you born                               | 19 _ _                                                                                                                                                                                                                                                                                                        |                                                              |
| ... | ...                                                       |                                                                                                                                                                                                                                                                                                               |                                                              |
| 107 | To which corporation do you belong or feel most attached? | → <input type="checkbox"/> none    → <input type="checkbox"/> Grindel    → <input type="checkbox"/> Itramen    → <input type="checkbox"/> Bach    → <input type="checkbox"/> Bussalp    → <input type="checkbox"/> Wärgistal    → <input type="checkbox"/> Scheidegg    → <input type="checkbox"/> Holzmatten |                                                              |

|     |                                                                  |
|-----|------------------------------------------------------------------|
| 108 | Are you currently holding a formal position in this corporation? |
|     | Yes → <input type="checkbox"/> which ____ - _____                |
|     | No → <input type="checkbox"/> 2                                  |

## 2) Household structure

|     |                                                       |                                                                                                                                                                                                                                                  |
|-----|-------------------------------------------------------|--------------------------------------------------------------------------------------------------------------------------------------------------------------------------------------------------------------------------------------------------|
| 203 | Do you have a successor in your family for your farm? | Yes, most likely → <input type="checkbox"/> 1<br>Somewhat likely → <input type="checkbox"/> 2<br>Don't know yet → <input type="checkbox"/> 3<br>Somewhat unlikely → <input type="checkbox"/> 4<br>No, very unlikely → <input type="checkbox"/> 5 |
|-----|-------------------------------------------------------|--------------------------------------------------------------------------------------------------------------------------------------------------------------------------------------------------------------------------------------------------|

## 4) Labor

|     |                                                                                |                                                      |
|-----|--------------------------------------------------------------------------------|------------------------------------------------------|
| 401 | How many labor hours per day do you spend on average working on the farm?      | Summer →  _ _  hours/day<br>Winter →  _ _  hours/day |
| 402 | How many additional labor hours on a average day derive from unpaid workforce? | Summer →  _ _  hours/day<br>Winter →  _ _  hours/day |
| 403 | How many days per week do you usually spend working on your farm?              | Summer →  _ _  hours/day<br>Winter →  _ _  hours/day |

## 6) Land holdings

|     |                                                      | Today   | 10 years ago | 10 years from now |
|-----|------------------------------------------------------|---------|--------------|-------------------|
| 601 | How much agricultural area do you cultivate          | _ _  ha | _ _  ha      | _ _  ha           |
| 602 | Whereof leasehold                                    | _ _  ha | _ _  ha      | _ _  ha           |
| 603 | Whereof family succession                            | _ _  ha | _ _  ha      | _ _  ha           |
| 604 | How much agricultural land that you are cultivating? | _ _  ha | _ _  ha      | _ _  ha           |

## 8) Livestock endowment and appropriation

|     |                                                                      |                                  |                      |                      |                                                                                                  |                      |                      |                      |                      |
|-----|----------------------------------------------------------------------|----------------------------------|----------------------|----------------------|--------------------------------------------------------------------------------------------------|----------------------|----------------------|----------------------|----------------------|
| 801 | How many livestock units do you currently hold?<br> _ _  [Number LU] |                                  |                      |                      | How many of did you sent to the common pasture?<br> _ _  [Number LU]                             |                      |                      |                      |                      |
|     | In which corporation do you hold use rights?                         | How many use rights do you hold? |                      |                      | How many of these animals have you sent to graze common pastures in the following corporations ? |                      |                      |                      |                      |
|     |                                                                      | Full right                       | Quarter              | Eight                | cows                                                                                             | young cattle         | calf                 | sheep                | goat                 |
| 802 | Scheidegg <input type="checkbox"/> 1                                 | <input type="text"/>             | <input type="text"/> | <input type="text"/> | <input type="text"/>                                                                             | <input type="text"/> | <input type="text"/> | <input type="text"/> | <input type="text"/> |
| 803 | Grindel <input type="checkbox"/> 2                                   | <input type="text"/>             | <input type="text"/> | <input type="text"/> | <input type="text"/>                                                                             | <input type="text"/> | <input type="text"/> | <input type="text"/> | <input type="text"/> |
| 804 | Wärgistal <input type="checkbox"/> 3                                 | <input type="text"/>             | <input type="text"/> | <input type="text"/> | <input type="text"/>                                                                             | <input type="text"/> | <input type="text"/> | <input type="text"/> | <input type="text"/> |
| 805 | Holzmatten <input type="checkbox"/> 4                                | <input type="text"/>             | <input type="text"/> | <input type="text"/> | <input type="text"/>                                                                             | <input type="text"/> | <input type="text"/> | <input type="text"/> | <input type="text"/> |
| 806 | Ittramen <input type="checkbox"/> 5                                  | <input type="text"/>             | <input type="text"/> | <input type="text"/> | <input type="text"/>                                                                             | <input type="text"/> | <input type="text"/> | <input type="text"/> | <input type="text"/> |
| 807 | Bussalp <input type="checkbox"/> 6                                   | <input type="text"/>             | <input type="text"/> | <input type="text"/> | <input type="text"/>                                                                             | <input type="text"/> | <input type="text"/> | <input type="text"/> | <input type="text"/> |
| 808 | Bach <input type="checkbox"/> 7                                      | <input type="text"/>             | <input type="text"/> | <input type="text"/> | <input type="text"/>                                                                             | <input type="text"/> | <input type="text"/> | <input type="text"/> | <input type="text"/> |

## 9) Provision

|     |                                                            |                                                                                                                                                      |                                                                                                                                                              |
|-----|------------------------------------------------------------|------------------------------------------------------------------------------------------------------------------------------------------------------|--------------------------------------------------------------------------------------------------------------------------------------------------------------|
| 901 | How much of your provision duties do you normally fulfill? | Much more than I have to<br>A little more than I have to<br>Exactly the amount I have to<br>A little less than I have to<br>Much less than I have to | → <input type="checkbox"/> 1<br>→ <input type="checkbox"/> 2<br>→ <input type="checkbox"/> 3<br>→ <input type="checkbox"/> 4<br>→ <input type="checkbox"/> 5 |
|-----|------------------------------------------------------------|------------------------------------------------------------------------------------------------------------------------------------------------------|--------------------------------------------------------------------------------------------------------------------------------------------------------------|

### 11) Income

|      |                                                                               |                                                                                                                                             |       |
|------|-------------------------------------------------------------------------------|---------------------------------------------------------------------------------------------------------------------------------------------|-------|
| 1105 | How much of your total household income results from agricultural activities? |                                                                                                                                             | _ _ % |
| 1106 | How do the following activities contribute to your income?                    | Sails of alpine cheese  _ _ %<br>Milk  _ _ %<br>Direct payments  _ _ %<br>Meat production  _ _ %<br>Animal sales & breeding  _ _ %<br>Other |       |
|      | Other _____                                                                   |                                                                                                                                             |       |
| 1107 | How much of your total household income results from agricultural activities? |                                                                                                                                             | _ _ % |

### 12) Personal Information

|      |                                                                                                          |                                                                                                                                                                         |
|------|----------------------------------------------------------------------------------------------------------|-------------------------------------------------------------------------------------------------------------------------------------------------------------------------|
| 1207 | What is your current gross household income?<br>(before tax and social insurance)?<br><br>CHF  _ _ _ _ _ | <input type="checkbox"/> <50'000 CHF<br><input type="checkbox"/> 50-99'999 CHF<br><input type="checkbox"/> 100'000-149'000 CHF<br><input type="checkbox"/> >150'000 CHF |
|------|----------------------------------------------------------------------------------------------------------|-------------------------------------------------------------------------------------------------------------------------------------------------------------------------|

## STATA codes for the regression models

Also available at <https://osf.io/vyskq>

```
import excel "\\Client\C$\Users\.....", sheet("cleaned") firstrow clear

rename T prov_binary2
rename U area1
rename V area

ssc inst univar
rename payoff payoff_gve
*univar return_slv returnr_summering
*rename return_slv rev_slv
*sum rev_slv
rename gve_total_2010 gve
*univar share_farmincome
*univar opp_c
*sum rev_totslv
**socio-demo
*univar bornlocal
*univar leadership
*univar succ_d
*univar y_left
*univar yearspast
*univar age

gen appl00 = app_ratio*100

sum gve
sum gve if gve>4 & gve<30
sum gve if gve>4
sum gve if opp_c > 0
univar gve

tab A_1

*****
*Appropriation models*
*****
ssc inst outreg2

** Model 1. ok
reg appl00 gve LU_intens share_farmincome opp_c kv jv leadership succ_d
y_left if gve>2 & gve<30
estat vif
estat imtest
outreg2 using App_Provision.xls, e(all) append bdec(1) ctitle(App OLS)

**Model with subsamples**
*Split by MEAN
*testing Opp_i for big farmers N=38
```

```

reg app100 gve LU_intens share_farmincome opp_c kv jv leadership succ_d
y_left if gve>11.5 & gve<30
estat vif
estat imtest
outreg2 using App_Provision.xls, e(all) append bdec(1) ctitle(App OLS N=38
large)

*testing Opp_i for small farmers N=41
reg app100 gve LU_intens share_farmincome opp_c kv jv leadership succ_d
y_left if gve>2 & gve<11.5
estat vif
estat imtest
outreg2 using App_Provision.xls, e(all) append bdec(1) ctitle(App OLS N=41
small)

*****Multilevel Appropriation*****
**Multilevel with random intercepts and coefficients intercepts by Alp
**without group behavior (A, P)
mixed app100 gve LU_intens share_farmincome opp_c kv jv leadership succ_d
y_left p_duty penalty || Alp_belo: p_duty penalty if gve>2 & gve<30
outreg2 using App_Provision.xls, e(all) append bdec(1) ctitle(App HML RE
Inter omit A&P)

***leadership
mixed app100 gve LU_intens share_farmincome opp_c kv jv leadership succ_d
y_left p_duty penalty || Alp_belo: p_duty penalty if leadership == 1 & gve>2
& gve<30
outreg2 using App_Provision.xls, e(all) append bdec(1) ctitle(App HML RE for
leaders)

mixed app100 gve LU_intens share_farmincome opp_c kv jv leadership succ_d
y_left p_duty penalty || Alp_belo: p_duty penalty if leadership == 0 & gve>2
& gve<30
outreg2 using App_Provision.xls, e(all) append bdec(1) ctitle(App HML RE for
non-leaders)

mixed app100 gve LU_intens share_farmincome opp_c kv jv leadership succ_d
y_left p_duty penalty Aj_1 || Alp_belo: p_duty penalty Aj_1 if leadership ==
0 & gve>2 & gve<30
outreg2 using App_Provision.xls, e(all) append bdec(1) ctitle(App HML RE for
non-leaders incld leader behavior)

***leadership behavior Aj
*mixed app100 gve LU_intens share_farmincome opp_c kv jv leadership succ_d
y_left p_duty penalty Aj_1 || Alp_belo: p_duty penalty Aj_1 if gve>2 & gve<30
*outreg2 using App_Provision.xls, e(all) append bdec(1) ctitle(App with
leaders appropriation behavior (Aj_1))

*****
***Provision models
*****

***PROVISION MODELS*****

sum provision_binary

```

```

sum Provision
tab Provision

tab Prov_ord
recode Prov_ord 1=5 2=4 3=3 4=2 5=1 6=1
tab Prov_ord
** higher numbers means higher provision

**much better when dep. variable is ordinal
ologit Prov_ord_5 gve app_ratio LU_intens share_farmincome opp_c leadership
succ_d y_left
outreg2 using App_Provision.xls, e(all) append bdec(1) ctitle(Provision
Ologit)

*mixed effects

*without group behavior
meologit Prov_ord_5 gve app100 LU_intens share_farmincome opp_c leadership
succ_d y_left p_duty penalty || Alp_belo:
outreg2 using App_Provision.xls, e(all) append bdec(1) ctitle(Provision mixed
effects, institutions but no group behavior)

*** Including group behavior
meologit Prov_ord_5 gve app100 LU_intens share_farmincome opp_c leadership
succ_d y_left p_duty penalty Aj Pj || Alp_belo:
outreg2 using App_Provision.xls, e(all) append bdec(1) ctitle(Provision mixed
effects, institutions but no group behavior)

** Including leader behavior

**leader split in

meologit Prov_ord_5 gve app100 LU_intens share_farmincome opp_c leadership
succ_d y_left p_duty penalty Aj Pj || Alp_belo: || if leadership == 1
outreg2 using App_Provision.xls, e(all) append bdec(1) ctitle(Provision mixed
effects only the leaders incl group behavior)

meologit Prov_ord_5 gve app100 LU_intens share_farmincome opp_c leadership
succ_d y_left p_duty penalty Aj Pj || Alp_belo: || if leadership == 0
outreg2 using App_Provision.xls, e(all) append bdec(1) ctitle(Provision mixed
effects only the leaders incl group behavior)

*leader split including group behavior

**non leader with leader behavior

meologit Prov_ord_5 gve app100 LU_intens share_farmincome opp_c leadership
succ_d y_left p_duty penalty Aj_l Pj_l || Alp_belo: || if leadership == 0
outreg2 using App_Provision.xls, e(all) append bdec(1) ctitle(Provision mixed
effects only the leaders incl group behavior)

meologit Prov_ord_5 gve app100 LU_intens share_farmincome opp_c leadership
succ_d y_left p_duty penalty Aj_l Pj_l || Alp_belo:
outreg2 using App_Provision.xls, e(all) append bdec(1) ctitle(Provision mixed
effects only the leaders incl group behavior)

```
